# Supplementary material
Source: PubMed Central journal article supplement (PMC5530587)
Supplement: NIHMS884571-supplement-sup.pdf [file NIHMS884571-supplement-sup.pdf]

## 7. Supplemental figures

**Table S.1:** Standard logistic regression on all subjects (N=48) using predictive features extracted from 24 hours of cleaned RR intervals ( $RR_i$ ). OR is odds ratio, and CI is confidence interval.

| Feature       | $\beta$ coefficient | P-value | OR [95% CI]           |
|---------------|---------------------|---------|-----------------------|
| $\sigma_{rr}$ | 0.08                | 0.90    | 1.1 [3.1e-01 3.8]     |
| $IQR_{rr}$    | 0.10                | 0.84    | 1.1 [4.3e-01 2.9]     |
| LF            | -0.36               | 0.44    | 7.0e-01 [2.8e-01 1.7] |
| SDNN          | -0.01               | 0.99    | 9.9e-01 [3.3e-01 2.9] |

**Table S.2:** Standard logistic regression on all subjects (N=48) using predictive features extracted from quiescent segments of cleaned RR intervals ( $RR_i$ ). OR is odds ratio, and CI is confidence interval.

| Feature | $\beta$ coefficient | P-value | OR [95% CI]           |
|---------|---------------------|---------|-----------------------|
| AC      | 0.89                | 0.20    | 2.4 [6.3e-01 9.4]     |
| DC      | -1.15               | 0.10    | 3.2e-01 [8.1e-02 1.2] |
| LF      | -0.44               | 0.08    | 6.5e-01 [4.0e-01 1.0] |
| SDNN    | 0.15                | 0.50    | 1.2 [7.5e-01 1.8]     |

**Table S.3:** AUCs of L1L2 regularized logistic regression models using the top four features extracted from cleaned RR intervals, for either all subjects (N=48) or just paired twins (N=38). Values shown are medians across sub-samples and IQR bounds in brackets.

|                    | All subjects     |                  | Paired twins     |                  |
|--------------------|------------------|------------------|------------------|------------------|
|                    | Train AUC        | Test AUC         | Train AUC        | Test AUC         |
| 24 hours           | 0.73 [0.69 0.74] | 0.67 [0.62 0.71] | 0.70 [0.66 0.72] | 0.64 [0.56 0.75] |
| Random segments    | 0.74 [0.73 0.80] | 0.74 [0.57 0.77] | 0.79 [0.75 0.83] | 0.76 [0.58 0.78] |
| Quiescent segments | 0.85 [0.83 0.88] | 0.86 [0.75 0.88] | 0.86 [0.82 0.88] | 0.81 [0.69 0.86] |
